# Supplementary material for: Cobalt porphyrin electrode films for electrocatalytic water oxidation
Source: Royal Society of Chemistry journal article supplement (doi:10.1039/c4cp00523f), 2014-01-01
Supplement: c4cp00523f2.pdf [file c4cp00523f2.pdf]

Supporting information

## **Cobalt Porphyrin Electrode Films for Electrocatalytic Water Oxidation**

Ali Han,<sup>a</sup> Hongxing Jia,<sup>a</sup> Hao Ma,<sup>a</sup> Shifan Ye,<sup>a</sup> Haotian Wu,<sup>a</sup> Haitao Lei,<sup>b</sup> Yongzhen Han,<sup>b</sup> Rui Cao,<sup>\*b</sup> and Pingwu Du <sup>\*a</sup>

<sup>a</sup> CAS Key Laboratory of Materials for Energy Conversion, Department of Materials Science and Engineering, Department of Chemistry, University of Science and Technology of China (USTC), Hefei, China 230026. <sup>b</sup> Department of Chemistry, Renmin University of China, Beijing, China 100872

\*Corresponding author: [dupingwu@ustc.edu.cn](mailto:dupingwu@ustc.edu.cn); [ruicao@ruc.edu.cn](mailto:ruicao@ruc.edu.cn)

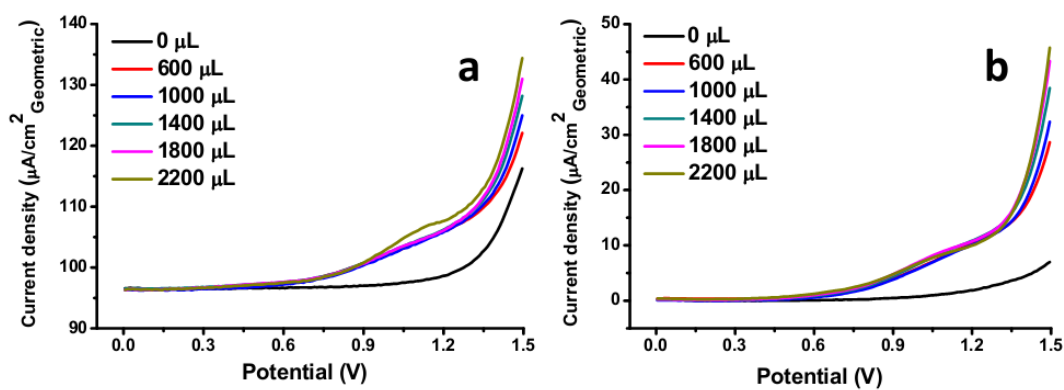

**Figure S1.** The CV scans were recorded by using bare FTO as working electrodes in 0.1 M TBAH (in 40 mL anhydrous DMF) containing 20 nmol **CoP-1/CoP-2** by gradually adding a certain amount of water. The scan rates were 50 mV/s and there were iR compensations (about 3-8 ohms). a, **CoP-1**; b, **CoP-2**.

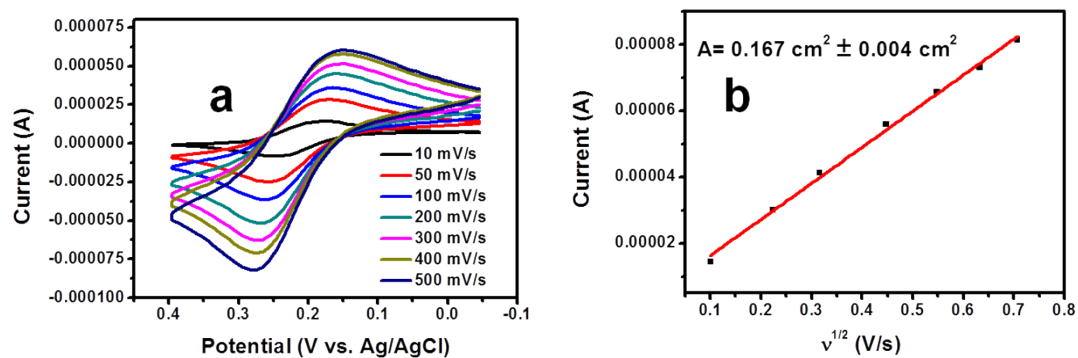

**Figure S2.** (a). CVs of the FTO electrode in a 0.91 mM ferricyanide solution at various scan rates. (b) Plot of maximum peaks of anodic current (ferro/ferricyanide couple) versus  $v^{1/2}$ .

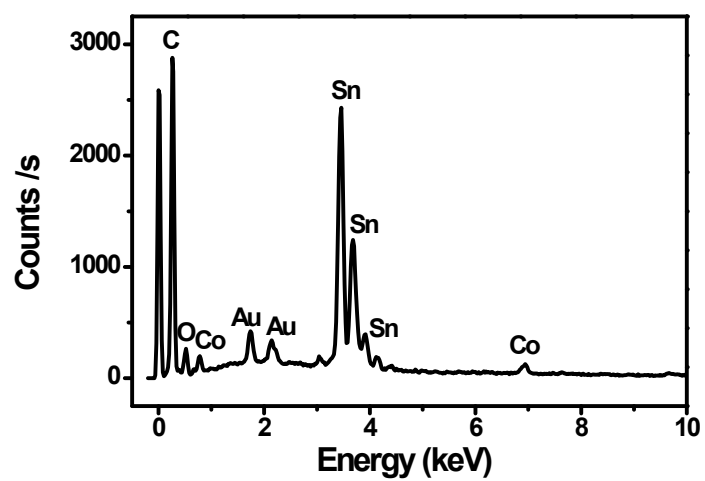

**Figure S3.** EDX data for FTO coated with CoP-1 film before bulk electrolysis.

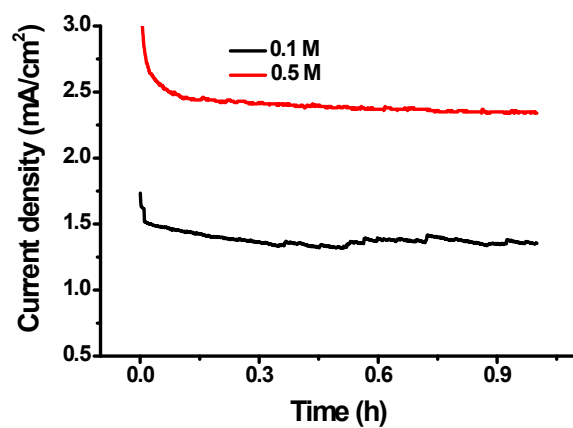

**Figure S4.** The profiles of bulk electrolysis at 1.3 V for **CoP-1** in 0.5 M and 0.1 M Bi solutions. The working electrodes were FTO coated with 20 nmol **CoP-1**. Black plot: 0.1 M Bi solution; red plot: 0.5 M Bi solution.

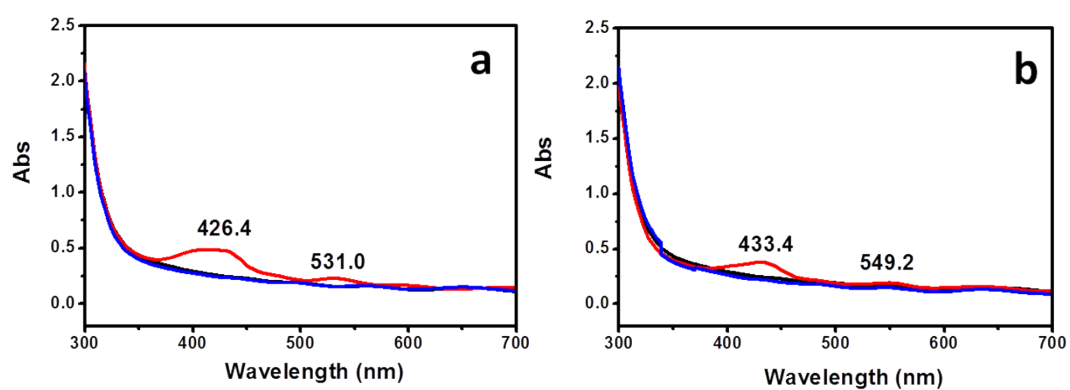

**Figure S5.** The absorption spectra (a for **CoP-1** and b for **CoP-2**) of the FTO electrodes. Black plot: the bare FTO; red plot: the FTO coated with cobalt porphyrin films; blue plot: the FTO after electrolysis and washed by THF.

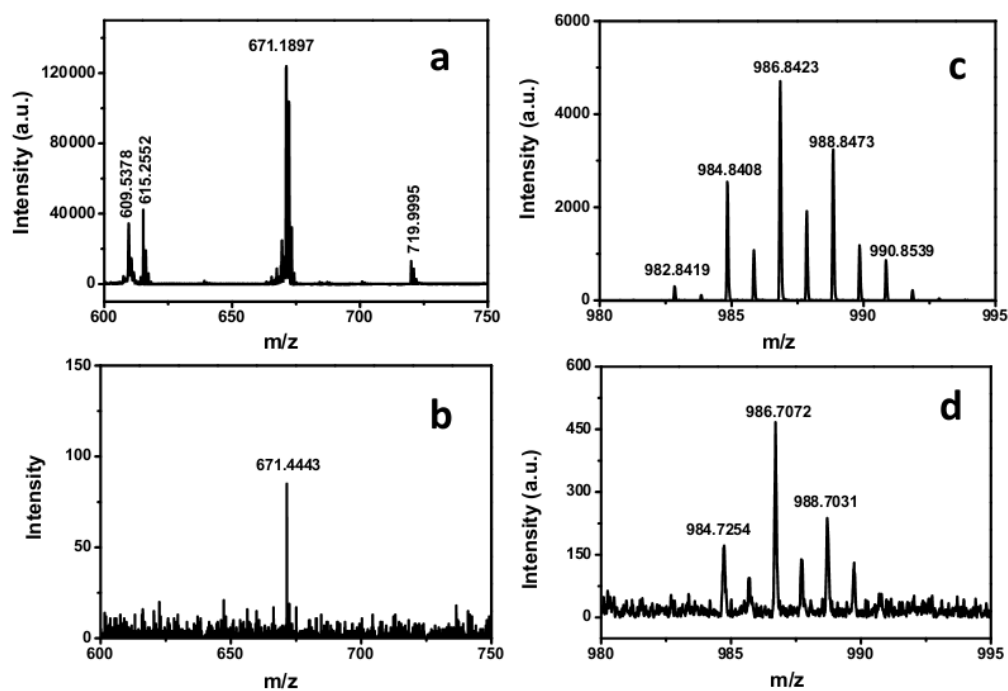

**Figure S6.** HRMS spectrometry of **CoP-1** before electrolysis (a) and after electrolysis (b) and **CoP-2** before electrolysis (c) after electrolysis (d).

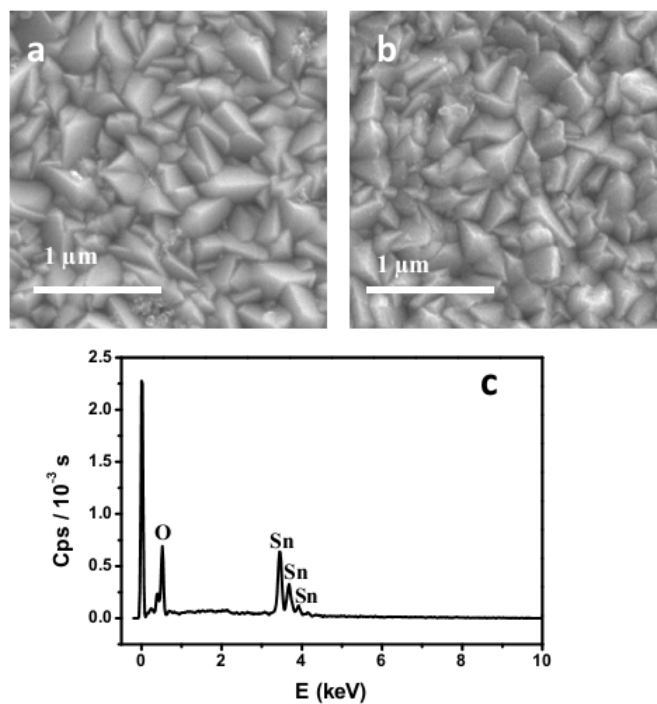

**Figure S7.** (a) SEM images for bare FTO and (b) FTO coated with **CoP-2** after bulk electrolysis and washed by THF. (c) EDX data for FTO coated with **CoP-2** after bulk electrolysis and washed by THF.

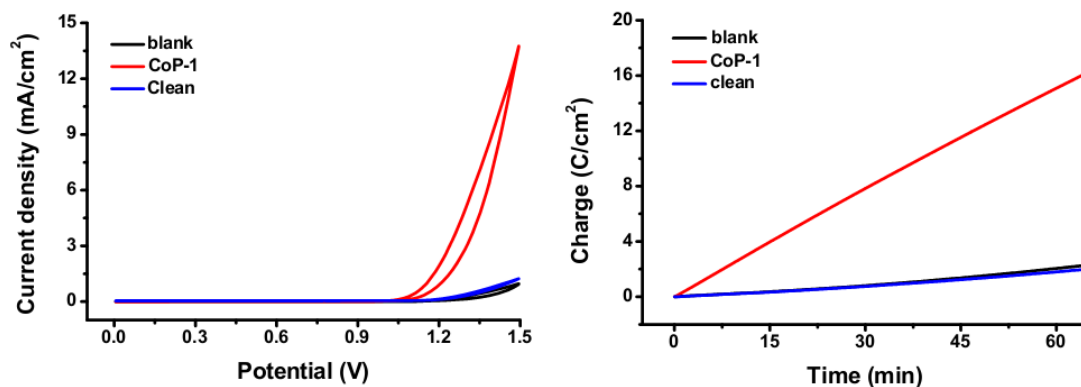

**Figure S8.** (left) Cyclic voltammograms obtained using FTO coated with 20 nmol/cm<sup>2</sup> CoP-1 as the working electrode in a 0.5 M Bi solution. Red plot: CoP-1 deposited FTO; blue plot: clean FTO. The black plot was recorded as the control test in the electrolyte solution using a bare FTO as the working electrode. The scan rate is 50 mV/s with iR compensation. (right) The charges passed through the working electrode during 1 hour electrolysis in a 0.5 M Bi solution at 1.3 V (vs Ag/AgCl). Black plot: bare FTO; red plot: CoP-1 deposited FTO; blue plot: clean FTO.

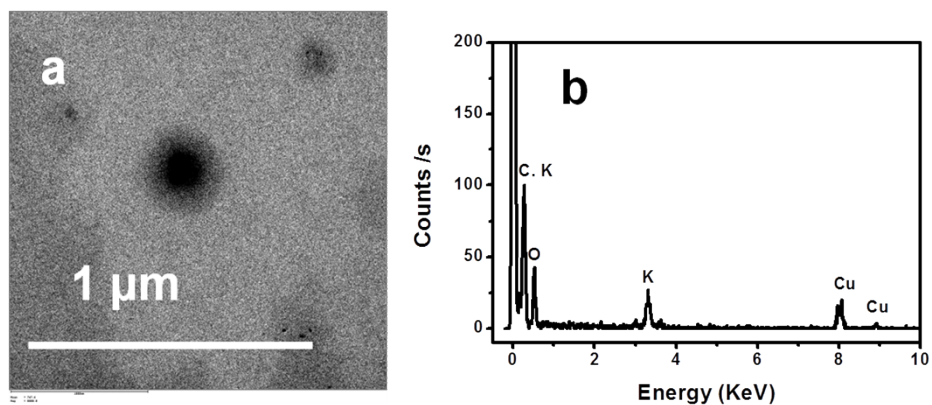

**Figure S9.** (a) TEM images for the solution after bulk electrolysis using FTO coated with **CoP-1** film as the working electrode. (b) EDX data for the sample measured in (a).

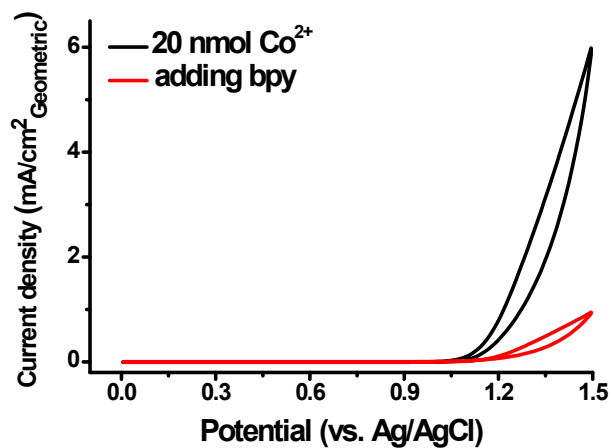

**Figure S10.** Cyclic voltammograms obtained in a 0.5 M Bi solution containing 20 nmol Co<sup>2+</sup> by using bare FTO as the working electrodes. After several CV scans, to the electrolyte solution was added excess bpy (80  $\mu$ mol). black plot- the CV plot with no bpy, red plot- the CV plot with bpy. Both CV scans used the bare FTO as the working electrode. The scan rate is 50 mV/s and there is iR compensation (about 3-8 ohms).

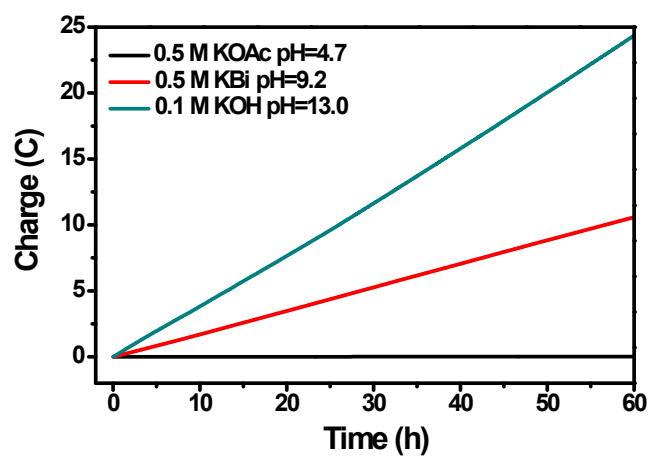

**Figure S11.** The charge passed through the working electrode during 1 hour electrolysis of **CoP-1** film under different pH solutions at 1.3 V, black plot: pH=4.7; red plot: pH=9.2; green plot: pH=13.0. The area of the working electrode is 0.75 cm<sup>2</sup>.

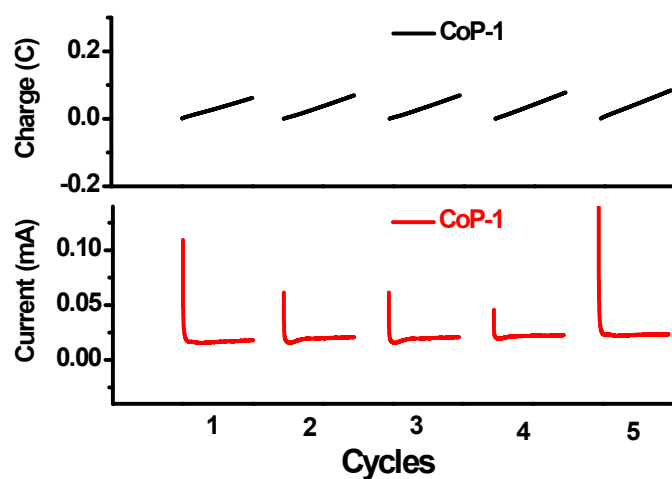

**Figure S12.** The recyclability of **CoP-1** catalyst film for water oxidation under the controlled potential at 1.3 V in a 0.5 M Bi solution. The black plot represented the passed charge and the red plot displayed the current density during electrolysis. For the whole process, the GCE electrode ( $d=3$  mm) coated with **CoP-1** film was used, washed with THF after 1 hour electrolysis and reused for another cycle of electrolysis.
